# Supplementary material
Source: Royal Society of Chemistry journal article supplement (doi:10.1039/d5mh02377g)
Supplement: d5mh02377g1.pdf [file d5mh02377g1.pdf]

## Supporting information

# Exchange bias induced by the spin glass-like phase in multifunctional ferrimagnetic $\text{CoFe}_2\text{O}_4$ thin films†

Songjiang He,<sup>‡a</sup> Shuang Pan,<sup>‡a</sup> Lang Cheng,<sup>a</sup> Sichao Dai,<sup>a</sup> Xiuhao Mo,<sup>b</sup> Chao Wang,<sup>b</sup> Fangchao Long,<sup>c</sup> Shengqiang Zhou<sup>c</sup> and Yu-Jia Zeng<sup>\*a</sup>

<sup>a</sup> Key Laboratory of Optoelectronic Devices and Systems of Ministry of Education and Guangdong Province, College of Physics and Optoelectronic Engineering, Shenzhen University, Shenzhen 518060, P. R. China

<sup>b</sup> Institute of Nanosurface Science and Engineering, Guangdong Provincial Key Laboratory of Micro/Nano Optomechatronics Engineering, College of Mechatronics and Control Engineering, Shenzhen University, Shenzhen 518060, China

<sup>c</sup> Helmholtz-Zentrum Dresden-Rossendorf, Institute of Ion Beam Physics and Materials Research, Dresden 01328, Germany

† Electronic supplementary information (ESI) available.

‡ Equally contributed to this work.

\* Corresponding authors (E-mail: yjzeng@szu.edu.cn (Zeng YJ))

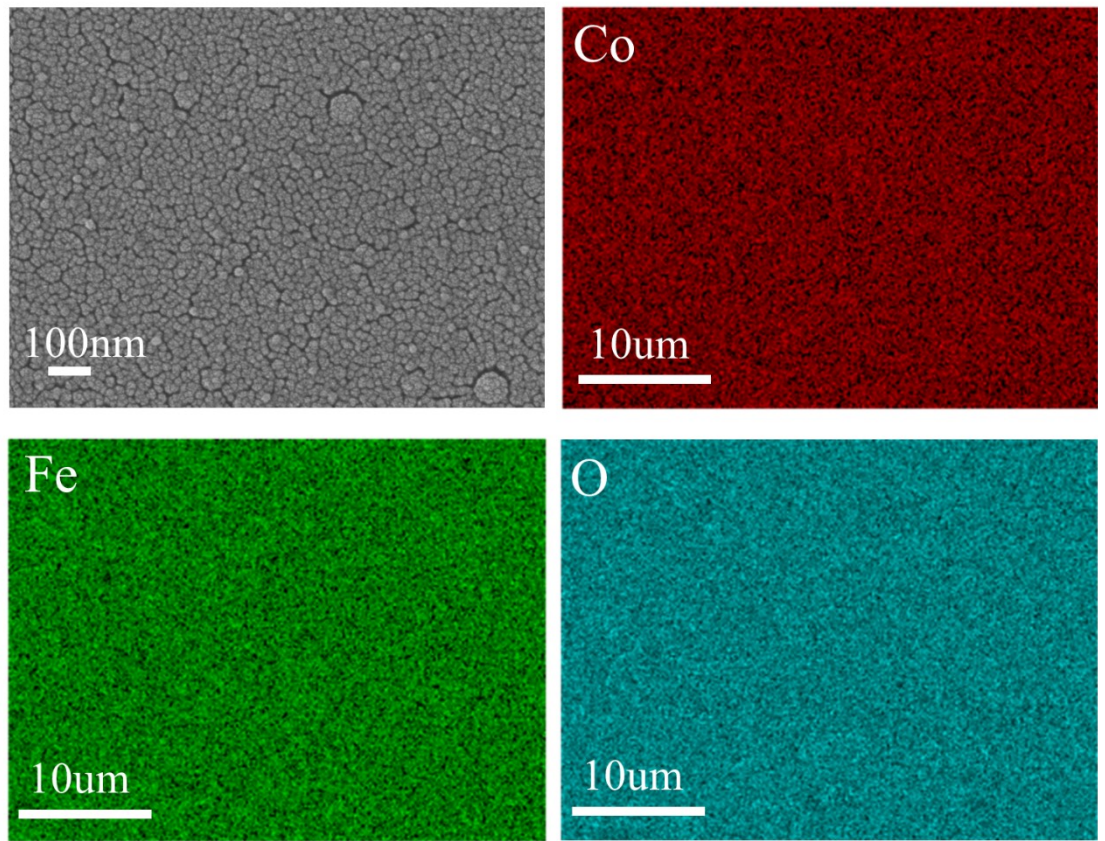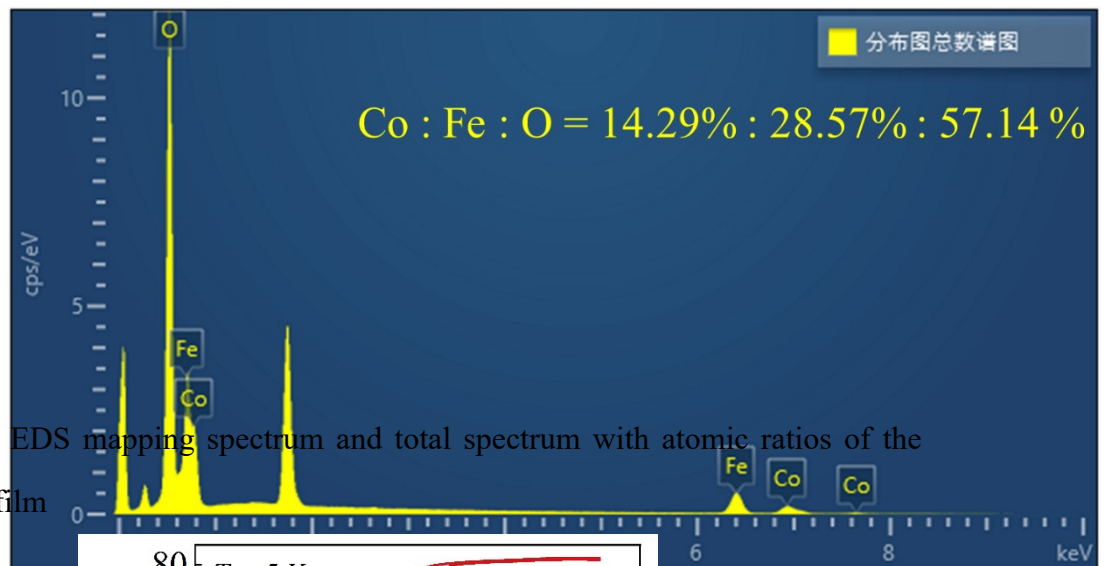

**Fig. S1** SEM, EDS mapping spectrum and total spectrum with atomic ratios of the  $\text{CoFe}_2\text{O}_4$  thin film

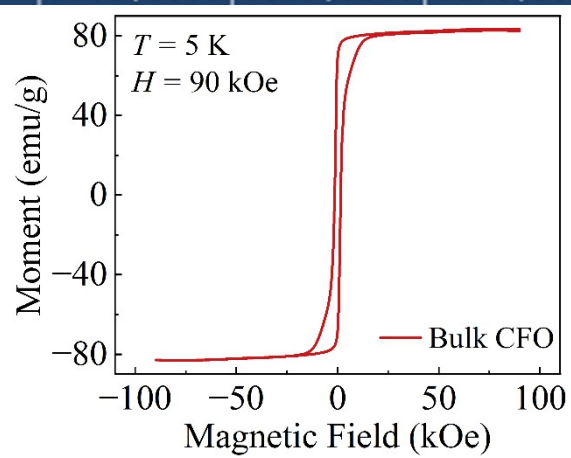

**Fig. S2** Magnetic hysteresis of the bulk CFO at 5 K.

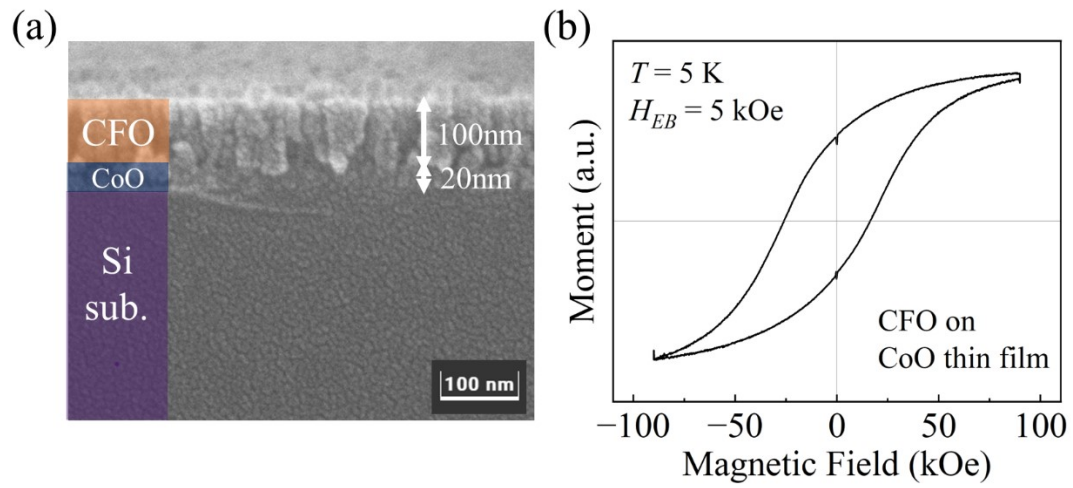

**Fig. S3** (a) Cross-sectional SEM image of the CFO/CoO bilayer thin films. (b) Magnetic hysteresis of the CFO/CoO heterostructure. The  $H_{EB}$  is approximately 5 kOe.

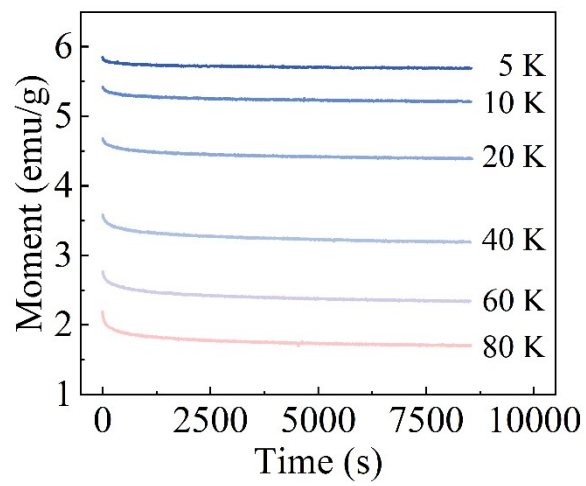

**Fig. S4** Isothermal magnetization relaxation at different temperatures after field cooling 90 kOe.

**Table S1** Exchange bias of different materials.

| Types      | Materials         | Phase  | $T$ (K) | $H_C$<br>(kOe) | $H_{EB}$<br>(kOe) | Reference |
|------------|-------------------|--------|---------|----------------|-------------------|-----------|
| Thin films | CFO               | FIM/SG | 5       | 25.1           | 11.1              | This work |
| Thin films | CFO               | FM/AFM | 20      | 11.8           | 0.9               | 1         |
| Thin films | NCO               | FM/AFM | 10      | 1.4            | 1.6               | 2         |
| Thin films | LMO               | FM/AFM | 5       | 1.263          | 0.302             | 3         |
| Thin films | NMS               | FM/AFM | 10      | 0.226          | 0.221             | 4         |
| Thin films | CrO/TiO           | FM/AFM | 10      | 0.27           | 0.15              | 5         |
| Thin films | CuO/Co            | FM/AFM | 5       | 2.4            | 0.9               | 6         |
| Thin films | Co/CoO            | FM/AFM | 2       | 7.3            | 6.172             | 7         |
| Thin films | CFO/CoO           | FM/AFM | 100     | 4.6            | 3.9               | 8         |
| Thin films | Co/ZnO            | FM/AFM | 10      | 1.6            | 0.963             | 9         |
| Thin films | EuSi <sub>2</sub> | FM/AFM | 2       | 1.1            | 0.5               | 10        |
| Thin films | NNMO              | FM/SG  | 2       | 1.5            | 0.532             | 11        |
| Thin films | MNCT              | FM/SG  | 2       | 0.47           | 0.098             | 12        |
| Thin films | CuMn              | FM/SG  | 5       | 1.5            | 1.4               | 13        |
| Thin films | FeAu/FeNi         | FM/SG  | 2       | 0.270          | 0.110             | 14        |
| Thin films | MFO/Si            | FM/SG  | 10      | 0.54           | 0.19              | 15        |
| Bulk       | MNS               | FIM/SG | 2       | 2.19           | 10.19             | 16        |
| Bulk       | HFM               | FIM/SG | 5       | 20.5           | 4.6               | 17        |
| Bulk       | NMG               | FM/AFM | 2       | 4              | 6                 | 18        |
| Bulk       | GCMO              | FM/AFM | 5       | 0.5            | 0.311             | 19        |
| Bulk       | NMAS              | FM/AFM | 2       | 3.8            | 2.5               | 20        |
| Bulk       | LSMO              | FM/SG  | 2       | 4              | 2.52              | 21        |
| Bulk       | MNS               | AFM/SG | 2       | 0.515          | 3.52              | 22        |
| Bulk       | LFSO              | AFM/SG | 2       | 1.2            | 0.450             | 23        |
| Bulk       | NMIF              | AFM/SG | 5       | 2              | 5.3               | 24        |
| Bulk       | NCMS              | AFM/SG | 3       | 1.7            | 7                 | 25        |

|        |       |        |    |       |       |    |
|--------|-------|--------|----|-------|-------|----|
| Bulk   | NMI   | AFM/SG | 10 | 1.7   | 1.35  | 26 |
| 2D     | MCS   | AFM/SG | 2  | 0.395 | 1.625 | 27 |
| Powder | MCN   | FIM/SG | 5  | 10    | 12    | 28 |
| Powder | LSCFO | FM/AFM | 5  | 12.8  | 1.2   | 29 |
| Powder | LCCFO | FIM/SG | 5  | 2     | 15.6  | 30 |
| Powder | CFO   | FM/AFM | 10 | 12.6  | 0.569 | 31 |

## Reference

- 1 D. Yang, Y. Yun, A. Subedi, N. E. Rogers, D. M. Cornelison, P. A. Dowben and X. Xu, *Phys. Rev. B*, 2021, **103**, 224405.
- 2 D. Yang, A. Subedi, C. Liu, H. Ambaye, V. Lauter, P. A. Dowben, Y. Liu and X. Xu, *Adv. Electron. Mater.*, 2025, **11**, 2400149.
- 3 G. Zhou, H. Ji, Y. Bai, Z. Quan and X. Xu, *Sci. China Mater.*, 2019, **62**, 1046–1052.
- 4 Y. Ling, Y. Hu, H. Wang, B. Niu, J. Chen, R. Liu, Y. Yuan, G. Wang, D. Wu, M. Xu, Z. Han, J. Du and Q. Xu, *ACS Appl. Mater. Interfaces*, 2021, **13**, 24285–24294.
- 5 W. Yuan, T. Su, Q. Song, W. Xing, Y. Chen, T. Wang, Z. Zhang, X. Ma, P. Gao, J. Shi and W. Han, *Sci. Rep.*, 2016, **6**, 28397.
- 6 M. Gamino, A. M. H. De Andrade, J. L. Salazar Cuaila, J. E. Schmidt, V. Skumryev and J. Geshev, *J. Magn. Magn. Mater.*, 2018, **449**, 5–9.
- 7 Y. Sun, W. Tang, S. Chen, L. Liu, H. Liu, J. Ge, X. Zhang, W. Jiang, H. Liang and Y. Zeng, *Adv. Phys. Res.*, 2023, **2**, 2200066.
- 8 T. D. Ha, J.-W. Chen, M. Yen, Y.-H. Lai, B.-Y. Wang, Y.-Y. Chin, W.-B. Wu, H.-J. Lin, J.-Y. Juang and Y.-H. Chu, *ACS Appl. Mater. Interfaces*, 2020, **12**, 46874–46882.
- 9 X. Liao, C. Wang, D. Zhao, W. Tang, H. Liang, Y.-J. Zeng, C. Van Haesendonck, Q. Song and H. Liu, *Appl. Phys. Rev.*, 2024, **11**, 041405.
- 10 D. V. Averyanov, I. S. Sokolov, A. N. Taldenkov, O. E. Parfenov, I. A. Karateev, O. A. Kondratev, A. M. Tokmachev and V. G. Storchak, *Nanoscale Horiz.*, 2023, **8**, 803–811.
- 11 A. K. Singh, S. Chauhan and R. Chandra, *Appl. Phys. Lett.*, 2017, **110**, 102402.
- 12 Y. Ling, Y. Hu, X. Chi, J. Chen, H. Wang, B. Niu, D. Wu, M. Xu, Z. Han, J. Du and Q. Xu, *J. Appl. Phys.*, 2022, **131**, 173902.
- 13 P. Liu, B. Lv, Y. Wang, P. Chen, L. Wang and C. Gao, *Phys. Rev. B*, 2024, **109**, 184412.
- 14 X. Chi, W. Rui, J. Du, S. Zhou, A. Du and Y. Hu, *Appl. Phys. Lett.*, 2016, **108**, 172401.
- 15 K. Mallick and P. S. Anil Kumar, *J. Appl. Phys.*, 2018, **124**, 053901.
- 16 J. Sharma, S. Gopinatha Warriar, M. M. Raja and A. Alam, *ACS Appl. Electron. Mater.*, 2024, **6**, 6356–6364.

- 17H. Zhou, Y. Cao, S. Khmelevskiy, Q. Zhang, S. Hu, M. Avdeev, C.-W. Wang, R. Zhou, C. Yu, X. Chen, Q. Li, J. Miao, Q. Li, K. Lin and X. Xing, *J. Am. Chem. Soc.*, 2024, **146**, 20770–20777.
- 18F. Tian, X. Ke, K. Cao, D. Wang, Q. Zhao, J. Li, Z. Dai, D. Wang, Y. Zhang, C. Zhou, Y. Wang, W. Zuo, M. Fang and S. Yang, *APL Mater.*, 2021, **9**, 011104.
- 19C. Li, W. Yang, Y. Lu, Y. Yang, C. Wang, Q. Lei, Y. Qiu and Y. Luo, *Appl. Phys. Lett.*, 2023, **123**, 172406.
- 20R. Singh, B. Ingale, L. K. Varga, V. V. Khovaylo and R. Chatterjee, *Phys. B Condens. Matter*, 2014, **448**, 143–146.
- 21S. Karmakar, S. Taran, E. Bose, B. K. Chaudhuri, C. P. Sun, C. L. Huang and H. D. Yang, *Phys. Rev. B*, 2008, **77**, 144409.
- 22J. Sharma and K. G. Suresh, *Appl. Phys. Lett.*, 2015, **106**, 072405.
- 23S. Banerjee, D. P. Panda, P. Yanda and A. Sundaresan, *Phys. Rev. Mater.*, 2023, **7**, 034405.
- 24X. Liao, L. Gao, Y. Wang, X. Xu, M. T. Khan, T. Chang, K. Chen, Y.-J. Zeng, S. Yang and P. Svedlindh, *Sci. China Mater.*, 2020, **63**, 1291–1299.
- 25X. Liao, S. Wei, Y. Wang, D. Wang, K. Wu, H. Liang, S. Yang, P. Svedlindh and Y. Zeng, *Adv. Phys. Res.*, 2023, **2**, 2200043.
- 26B. M. Wang, Y. Liu, P. Ren, B. Xia, K. B. Ruan, J. B. Yi, J. Ding, X. G. Li and L. Wang, *Phys. Rev. Lett.*, 2011, **106**, 077203.
- 27R. A. Murphy, L. E. Darago, M. E. Ziebel, E. A. Peterson, E. W. Zaia, M. W. Mara, D. Lussier, E. O. Velasquez, D. K. Shuh, J. J. Urban, J. B. Neaton and J. R. Long, *ACS Cent. Sci.*, 2021, **7**, 1317–1326.
- 28L. Ding, L. Chu, P. Manuel, F. Orlandi, M. Li, Y. Guo and Z. Liu, *Mater. Horiz.*, 2019, **6**, 318–325.
- 29R. C. Sahoo, Y. Takeuchi, A. Ohtomo and Z. Hossain, *Phys. Rev. B*, 2019, **100**, 214436.
- 30P. Singh, R. K. Singh, S. Dixit, N. Patel, M. Alam, S. Dan, A. Jain, K. Anand, V. K. Gangwar, R. Singh, A. G. Joshi, S. M. Yusuf and S. Chatterjee, *J. Phys. Condens. Matter*, 2022, **34**, 375803.
- 31B. Rivas-Murias, M. Testa-Anta, A. S. Skorikov, M. Comesaña-Hermo, S. Bals and V. Salgueiriño, *Nano Lett.*, 2023, **23**, 1688–1695.
